# Supplementary material for: Mentorship Interventions in Postgraduate Medical and STEM Settings: A Scoping Review.
Source: Atypon-hosted journal article supplement (doi:10.1187/cbe.23-08-0155), 2024-09-01
Supplement: combinedsupmats.pdf [file combinedsupmats.pdf]

# Supplemental Material

CBE—Life Sciences Education

Gangrade *et al.*

- Abel, S., & Carter-Templeton, H. (2020). Implementing a Transition-to-Practice Program for Novice Clinical Nurse Specialists: A Pilot Project. *Clinical Nurse Specialist CNS*, 34(4), 162–169. <https://doi.org/10.1097/nur.0000000000000531>
- Ahmed, O., Nugent, M., Cahill, R., & Mulsow, J. (2018). Attitudes to trainee-led surgical mentoring. *Irish Journal of Medical Science*, 187(3), 821–826. <https://doi.org/10.1007/s11845-017-1703-z>
- Altonji, S. J., Baños, J. H., & Harada, C. N. (2019). Perceived Benefits of a Peer Mentoring Program for First-Year Medical Students. *Teaching and Learning in Medicine*, 31(4), 445–452. <https://doi.org/10.1080/10401334.2019.1574579>
- Badawy, S., Black, V., Meier, E., Myers, K., Pinkney, K., Hastings, C., Hilden, J., Zweidler-McKay, P., Stork, L., Johnson, T., & Vaiselbuh, S. (2017). Early career mentoring through the American Society of Pediatric Hematology/Oncology: Lessons learned from a pilot program. *Pediatric Blood & Cancer*, 64(3). <https://doi.org/10.1002/pbc.26252>
- Benson, C. A., Morahan, P. S., Sachdeva, A. K., & Richman, R. C. (2002). Effective faculty preceptoring and mentoring during reorganization of an academic medical center. *Medical Teacher*, 24(5), 550–557. <https://doi.org/10.1080/0142159021000002612>
- Bingmer, K. M., Wojnarski, C. M. M., Brady, J. M., Stein, S. M., Ho, V. M., & Steinhagen, E. M. (2019). A Model for a Formal Mentorship Program in Surgical Residency -

ClinicalKey. *Journal of Surgical Research*, 243, 64–70.

<https://doi.org/10.1016/j.jss.2019.04.068>

Blanco, M., & Qualters, D. (2020). Mutual mentoring: Effect on faculty career achievements and experiences. *Medical Teacher*, 42(7), 799–805. <https://doi.org/10.1016/j.jacr.2020.09.025>

Bôas Fávero, C. V., Moran, S., & Eniola-Adefeso, O. (2018). The Power of Peer Mentoring in Enabling a Diverse and Inclusive Environment in a Chemical Engineering Graduate Program. *Chemical Engineering Education*, 52(2), 79–88.

Bonilha, H., Hyer, M., Krug, E., Mauldin, M., Edlund, B., Martin-Harris, B., Halushka, P., McGinty, J., Sullivan, J., Brady, K., Ranwala, D., Hermayer, K., Harvey, J., Paranal, R., Gough, J., Silvestri, G., & Chimowitz, M. (2019). An institution-wide faculty mentoring program at an academic health center with 6-year prospective outcome data. *Journal of Clinical and Translational Science*, 3(6), 308–315. <https://doi.org/10.1017/cts.2019.412>

Bredella, M., Alvarez, C., O'Shaughnessy, S., Lavigne, S., Brink, J., & Thrall, J. (2021). Radiology Mentoring Program for Early Career Faculty-Implementation and Outcomes. *Journal of the American College of Radiology : JACR*, 18(3), 451–456.

<https://doi.org/10.1016/j.jacr.2020.09.025>

Brownson, R., Jacob, R., Carothers, B., Chambers, D., Colditz, G., Emmons, K., Haire-Joshu, D., Kerner, J., Padek, M., Pfund, C., & Sales, A. (2021). Building the Next Generation of

Researchers: Mentored Training in Dissemination and Implementation Science.  
*Academic Medicine : Journal of the Association of American Medical Colleges*, 96(1),  
86–92. <https://doi.org/10.1097%2FACM.0000000000003750>

Buchwald, D., & Dick, R. (2011). Weaving the native web: using social network analysis to demonstrate the value of a minority career development program. *Academic Medicine : Journal of the Association of American Medical Colleges*, 86(6), 778–786.  
<https://doi.org/10.1097/acm.0b013e318217e824>

Buddeberg-Fischer, B., Vetsch, E., & Mattanza, G. (2004). Career support in medicine - experiences with a mentoring program for junior physicians at a university hospital. *Psycho-Social Medicine*, 1, Doc04. 10.1016/j.jacr.2020.09.025

Byington, C. L., Keenan, H., Phillips, J. D., Childs, R., Wachs, E., Berzins, M. A., Clark, K., Torres, M. K., Abramson, J., Lee, V., & Clark, E. B. (2016). A matrix mentoring model that effectively supports clinical and translational scientists and increases inclusion in biomedical research: Lessons From the University of Utah. *Academic Medicine*, 91(4), 497–502. <https://doi.org/10.1097/ACM.0000000000001021>

Caruso, T., Kung, T., Piro, N., Li, J., Katznelson, L., & Dohn, A. (2019). A Sustainable and Effective Mentorship Model for Graduate Medical Education Programs. *Journal of Graduate Medical Education*, 11(2), 221–225. <https://doi.org/10.4300/jgme-d-18-00650.2>

- Caruso, T., Steinberg, D., Piro, N., Walker, K., Blankenburg, R., Rassbach, C., JL, M., Katznelson, L., & Dohn, A. (2016). A Strategic Approach to Implementation of Medical Mentorship Programs. *Journal of Graduate Medical Education*, 8(1), 68–73. <https://doi.org/10.4300/jgme-d-15-00335.1>
- Chanchlani, S., Chang, D., JS, O., & Anwar, A. (2018). The value of peer mentoring for the psychosocial wellbeing of junior doctors: a randomised controlled study. *The Medical Journal of Australia*, 209(9), 401–405. <https://doi.org/10.5694/mja17.01106>
- Chen, M., Sandborg, C., Hudgins, L., Sanford, R., & Bachrach, L. (2016). A Multifaceted Mentoring Program for Junior Faculty in Academic Pediatrics. *Teaching and Learning in Medicine*, 28(3), 320–328. <https://doi.org/10.1080/10401334.2016.1153476>
- Croke, J., Tosoni, S., & Ringash, J. (2021). “It’s good for the soul:” Perceptions of a formal junior faculty mentorship program at a large academic cancer centre. *Radiotherapy and Oncology : Journal of the European Society for Therapeutic Radiology and Oncology*, 162, 119–123. <https://doi.org/10.1016/j.radonc.2021.07.003>
- Daley, S., Wingard, D. L., & Reznik, V. (2006). Improving the retention of underrepresented minority faculty in academic medicine. *Journal of the National Medical Association*, 98(9), 1435–1440.

- Dutta, R., Hawkes, S. L., Kuipers, E., Guest, D., Fear, N. T., & Iversen, A. C. (2011). One year outcomes of a mentoring scheme for female academics: A pilot study at the Institute of Psychiatry, King's College London. *BMC Medical Education, 11*(1), 1–9.  
<https://doi.org/10.1186/1472-6920-11-13/TABLES/3>
- Efstathiou, J., Drumm, M., Paly, J., Lawton, D., O'Neill, R., Niemierko, A., Leffert, L., Loeffler, J., & Shih, H. (2018). Long-term impact of a faculty mentoring program in academic medicine. *PloS One, 13*(11), e0207634. <https://doi.org/10.1371/journal.pone.0207634>
- Eiland, L. S., Marlowe, K. F., & Sacks, G. S. (2014). Development of faculty mentor teams in a pharmacy practice department. *Currents in Pharmacy Teaching and Learning, 6*(6), 759–766. <https://doi.org/10.1016/j.cptl.2014.08.002>
- Eiland, L., Shields, K., Smith, S., Covington, E., Edwards, A., Kinney, S., & Haines, S. (2021). Development and assessment of a nationwide, cross-discipline women faculty mentoring program. *Currents in Pharmacy Teaching & Learning, 13*(12), 1555–1563.  
<https://doi.org/10.1016/j.cptl.2021.09.031>
- Eisen, S., Sukhani, S., Brightwell, A., Stoneham, S., & Long, A. (2014). Peer mentoring: Evaluation of a novel programme in paediatrics. *Archives of Disease in Childhood, 99*(2), 142–146. <https://doi.org/10.1136/archdischild-2013-304277>

Files, J., Blair, J., Mayer, A., & Ko, M. (2008). Facilitated peer mentorship: a pilot program for academic advancement of female medical faculty. *Journal of Women's Health (2002)*, 17(6), 1009–1015. <https://doi.org/10.1089/jwh.2007.0647>

Fleming GM, JH, S., Xu, M., SB, G., RF, B., WB, C., Gigante, J., & WO, C. (2015). A facilitated peer mentoring program for junior faculty to promote professional development and peer networking. *Academic Medicin : Journal of the Association of American Medical Colleges*, 90(6), 819–826. <https://doi.org/10.1097/acm.0000000000000705>

Fox, K. C. (2010). Mentor program boosts new nurses' satisfaction and lowers turnover rate. *Journal of Continuing Education in Nursing*, 41(4), 311–316. <https://doi.org/10.3928/00220124-20100401-04>

Gabbe, S. G., Webb, L. E., Moore, D. E., Mandel, L. S., Melville, J. L., & Spickard, W. A. (2008). Can mentors prevent and reduce burnout in new chairs of departments of obstetrics and gynecology: results from a prospective, randomized pilot study. *American Journal of Obstetrics and Gynecology*, 198(6), 653.e1-653.e7. <https://doi.org/10.1016/j.ajog.2007.11.004>

Greene, S. M. (2021). Effects of a Peer-Mentoring Program on Speech-Language Pathology Graduate Student Stress. *Perspectives of the ASHA Special Interest Groups*, 6(4), 855–866. [https://doi.org/10.1044/2021\\_PERSP-20-00269](https://doi.org/10.1044/2021_PERSP-20-00269)

Grindel, C. G., & Hagerstrom, G. (2009). Nurses nurturing nurses: Outcomes and lessons learned. *MedSurg Nursing, 18*(3), 183.

Hall, M., Engler, J., Hemming, J., Alema-Mensah, E., Baez, A., Lawson, K., Quarshie, A., Stiles, J., Pemu, P., Thompson, W., Paulsen, D., Smith, A., & Ofili, E. (2018). Using a virtual community (The health equity learning collaboratory) to support early-stage investigators pursuing grant funding. *International Journal of Environmental Research and Public Health, 15*(11), 2408. <https://doi.org/10.3390/ijerph15112408>

Harris, T. B., Mian, A., Lomax, J. W., Scott-Gurnell, K., Sargen, J. A., Phillips, J. L., Mao, A. R., Thompson, B., Searle, N., Folensbee-Eddins, F., Andrews, L. B., Primm, A. B., & Coverdale, J. H. (2012). The texas regional psychiatry minority mentor network: A regional effort to increase psychiatry's workforce diversity. *Academic Psychiatry, 36*(1), 60–63. <https://doi.org/10.1176/appi.ap.09070107>

Hegmann, T. (2014). Outcomes of a nationwide mentoring program for physician assistant educators. *The Journal of Physician Assistant Education: The Official Journal of the Physician Assistant Education Association, 25*(4), 35–38. <https://doi.org/10.1097/01367895-201425040-00005>

Hickey, K., Hodges, E., Thomas, T., Coffman, M., Taylor-Piliae, R., Johnson-Mallard, V., Goodman, J., Jones, R., Kuntz, S., Galik, E., Gates, M., & Casida, J. (2014). Initial



evaluation of the Robert Wood Johnson Foundation Nurse Faculty Scholars program. In *Nursing outlook* (Vol. 62, Issue 6, pp. 394–401).

<https://doi.org/10.1016/j.outlook.2014.06.004>

Hunsberger, M., Baumann, A., & Crea-Arsenio, M. (2013). The road to providing quality care: orientation and mentorship for new graduate nurses. *The Canadian Journal of Nursing Research = Revue Canadienne de Recherche En Sciences Infirmieres*, 45(4), 72–87.

<https://doi.org/10.1177/084456211304500407>

Indyk, D., Deen, D., Fornari, A., MT, S., WH, L., & Rucker, L. (2011). The influence of longitudinal mentoring on medical student selection of primary care residencies. *BMC Medical Education*, 11, 27. <https://doi.org/10.1186/1472-6920-11-27>

Jackevicius, C. A., Le, J., Nazer, L., Hess, K., Wang, J., & Law, A. v. (2014). A formal mentorship program for faculty development. *American Journal of Pharmaceutical Education*, 78(5). <https://doi.org/10.5688/ajpe785100>

Jacob, R. R., Gacad, A., Padek, M., Colditz, G. A., Emmons, K. M., Kerner, J. F., Chambers, D. A., & Brownson, R. C. (2020). Mentored training and its association with dissemination and implementation research output: A quasi-experimental evaluation. *Implementation Science*, 15(1), 1–8. <https://doi.org/10.1186/s13012-020-00994-0>

Jacob, R. R., Gacad, A., Pfund, C., Padek, M., Chambers, D. A., Kerner, J. F., Sales, A., Dobbins, M., Kumanyika, S., & Brownson, R. C. (2020). The “secret sauce” for a mentored training program: qualitative perspectives of trainees in implementation research for cancer control. *BMC Medical Education*, *20*(1), 1–11.  
<https://doi.org/10.1186/s12909-020-02153-x>

Jadi, J., Shaughnessy, E., Barry, L., Reyna, C., Tsai, S., SM, D.-C., & Myers, S. (2022). Outcomes of a pilot virtual mentorship program for medical students interested in surgery. *American Journal of Surgery*. <https://doi.org/10.1016/j.amjsurg.2022.07.004>

Jangland, E., Gunningberg, L., & Nyholm, L. (2021). A mentoring programme to meet newly graduated nurses’ needs and give senior nurses a new career opportunity: A multiple-case study. *Nurse Education in Practice*, *57*, 103233.  
<https://doi.org/10.1016/j.nepr.2021.103233>

Jean-Louis, G., Ayappa, I., Rapoport, D., Zizi, F., Airhihenbuwa, C., Okuyemi, K., & Ogedegbe, G. (2016). Mentoring junior URM scientists to engage in sleep health disparities research: experience of the NYU PRIDE Institute. *Sleep Medicine*, *18*, 108–117.  
<https://doi.org/10.1016/j.sleep.2015.09.010>

Jefferies, A., & Skidmore, M. (2010). Evaluation of a collaborative mentorship program in a multi-site postgraduate training program. In *Medical teacher* (Vol. 32, Issue 8, pp. 695–697). <https://doi.org/10.3109/01421591003692680>

Jones, S. J. (2017). Establishing a Nurse Mentor Program to Improve Nurse Satisfaction and Intent to Stay. *Journal for Nurses in Professional Development*, 33(2), 76–78.  
<https://doi.org/10.1097/NND.0000000000000335>

Jordan, J., Watcha, D., Cassella, C., AH, K., & Trivedi, S. (2019). Impact of a Mentorship Program on Medical Student Burnout. *AEM Education and Training*, 3(3), 218–225.  
<https://doi.org/10.1002/aet2.10354>

Kman, N. E., Bernard, A. W., Khandelwal, S., Nagel, R. W., & Martin, D. R. (2013). A Tiered Mentorship Program Improves Number of Students With an Identified Mentor.  
<https://doi.org/10.1080/10401334.2013.827976>

Kohn, H. (2014). A mentoring program to help junior faculty members achieve scholarship success. *American Journal of Pharmaceutical Education*, 78(2).  
<https://doi.org/10.5688/ajpe78229>

Krofft, K., & Stuart, W. (2021). Implementing a Mentorship Program for New Nurses during a Pandemic. *Nursing Administration Quarterly*, 45(2), 152–158.  
<https://doi.org/10.1097/NAQ.0000000000000455>

Landsberger, S. A., Scott, E. L., Hulvershorn, L. A., Chapleau, K. M., Diaz, D. R., & McDougale, C. J. (2013). Mentorship of clinical-track junior faculty: Impact of a facilitated peer-

mentoring program to promote scholarly productivity. In *Academic Psychiatry* (Vol. 37, Issue 4, pp. 288–289). Springer. <https://doi.org/10.1176/appi.ap.12100177>

Lewinski, A. A., Mann, T., Flores, D., Vance, A., Bettger, J. P., & Hirschey, R. (2017). Partnership for development: A peer mentorship model for PhD students. *Journal of Professional Nursing*, 33(5), 363–369. <https://doi.org/10.1016/j.profnurs.2017.03.004>

Lewis, V., Martina, C. A., McDermott, M. P., Chaudron, L., Trief, P. M., LaGuardia, J. G., Sharp, D., Goodman, S. R., Morse, G. D., & Ryan, R. M. (2017). Mentoring Interventions for Underrepresented Scholars in Biomedical and Behavioral Sciences: Effects on Quality of Mentoring Interactions and Discussions. *CBE - Life Sciences Education*, 16(3). <https://doi.org/10.1187/cbe.16-07-0215>

Lewis, V., Martina, C. A., McDermott, M. P., Trief, P. M., Goodman, S. R., Morse, G. D., Laguardia, J. G., Sharp, D., & Ryan, R. M. (2016). A randomized controlled trial of mentoring interventions for underrepresented minorities. *Academic Medicine*, 91(7), 994–1001. <https://doi.org/10.1097/ACM.0000000000001056>

Libby, A., Hosokawa, P., Fairclough, D., Prochazka, A., Jones, P., & Ginde, A. (2016). Grant Success for Early-Career Faculty in Patient-Oriented Research: Difference-in-Differences Evaluation of an Interdisciplinary Mentored Research Training Program. In *Academic medicine : journal of the Association of American Medical Colleges* (Vol. 91, Issue 12, pp. 1666–1675). <https://doi.org/10.1097/acm.0000000000001263>

Lin, C., Lin, B., Lin, C., & Lee, C. (2015). Redesigning a clinical mentoring program for improved outcomes in the clinical training of clerks. *Medical Education Online*, *20*, 28327. <https://doi.org/10.3402/meo.v20.28327>

Lin, D., Gomez, D., Zhang, Y., Gennarelli, R., Efstathiou, J., Barker, C., Gelblum, D., Shah, M., Liberman, L., Hirsch, A., Cahlon, O., & Gillespie, E. (2022). Radiation Oncology AcaDemic Mentorship Program (ROADMAP) for Junior Faculty: One-Year Results of a Prospective Single Institution Initiative. *International Journal of Radiation Oncology, Biology, Physics*, *114*(1), 21–29. <https://doi.org/10.1016/j.ijrobp.2022.05.012>

Lord, J., Mourtzanos, E., McLaren, K., Murray, S., Kimmel, R., & Cowley, D. (2012). A peer mentoring group for junior clinician educators: four years' experience. *Academic Medicine : Journal of the Association of American Medical Colleges*, *87*(3), 378–383. <https://doi.org/10.1097/acm.0b013e3182441615>

Mahmood, H., Zheng, K., Elias, S., Sheriff, L., Endres, K., Rouhani, S., Malhi, G., & Khamisa, K. (2021). Implementation and evaluation of “I-Guide,” a pilot near-peer Internal Medicine mentorship program. *Canadian Medical Education Journal*, *12*(2), e100–e102. <https://doi.org/10.36834/cmej.70315>

Margherio, C., Horner-Devine, M. C., Mizumori, S. J. Y., & Yen, J. W. (2016). Learning to Thrive: Building Diverse Scientists' Access to Community and Resources through the

BRAINS Program. *CBE - Life Sciences Education*, 15(3).

<https://doi.org/10.1187%2Fcbe.16-01-0058>

Mayer, A., Blair, J., MG, K., SI, P., & JA, F. (2014). Long-term follow-up of a facilitated peer mentoring program. *Medical Teacher*, 36(3), 260–266.

<https://doi.org/10.3109/0142159x.2013.858111>

Mazerolle, S. M., Nottingham, S. L., & Barrett, J. L. (2018). Formal Mentoring in Athletic Training Higher Education: Perspectives from Participants of the National Athletic Trainers' Association Foundation Mentor Program. *Athletic Training Education Journal*, 13(2), 90–101. <https://doi.org/10.4085/130290>

McGuire, C., Riffenburg, K., Malope, S., Jack, B., & Borba, C. (2020). Mixed-methods evaluation of family medicine research training and peer mentorship in Lesotho. *African Journal of Primary Health Care & Family Medicine*, 12(1), e1–e17.

<https://doi.org/10.4102/phcfm.v12i1.2387>

Mills, J. F., & Mullins, A. C. (2008). The California nurse mentor project: Every nurse deserves a mentor. *Nursing Economics*, 26(5), 310–315.

<https://www.proquest.com/docview/236937392/fulltextPDF/52092FFE8A9840E7PQ/1?accountid=10267>

Moorthy, L. N., Muscal, E., Riebschleger, M., Klein-Gitelman, M., Nigrovic, L. E., Horon, J. R., Rouster-Stevens, K., Ferguson, P. J., Eberhard, B. A., Brunner, H. I., Prahalad, S.,

Schneider, R., & Nigrovic, P. A. (2016). Efficacy of an Interinstitutional Mentoring Program Within Pediatric Rheumatology. *Arthritis Care and Research*, *68*(5), 645–651.

<https://doi.org/10.1002/acr.22732>

Morrison, L., Lorens, E., Bandiera, G., Liles, W., Lee, L., Hyland, R., McDonald-Blumer, H.,

Allard, J., Panisko, D., Heathcote, E., & Levinson, W. (2014). Impact of a formal mentoring program on academic promotion of Department of Medicine faculty: a comparative study. *Medical Teacher*, *36*(7), 608–614.

<https://doi.org/10.3109/0142159x.2014.899683>

Moss, C. (2022). Examining Job Satisfaction and Intent to Stay for Neonatal Nurse Practitioners:

The Impact of Mentoring. *Advances in Neonatal Care : Official Journal of the National Association of Neonatal Nurses*, *22*(4), 341–351.

<https://doi.org/10.1097/anc.0000000000000931>

Moss, J., Teshima, J., & Leszcz, M. (2008). Peer group mentoring of junior faculty. *Academic*

*Psychiatry : The Journal of the American Association of Directors of Psychiatric Residency Training and the Association for Academic Psychiatry*, *32*(3), 230–235.

<https://doi.org/10.1176/appi.ap.32.3.230>

Nagarur, A., RM, O., Lawton, D., & JL, G. (2018). Supporting Faculty Development in Hospital

Medicine: Design and Implementation of a Personalized Structured Mentoring Program.

*Journal of Hospital Medicine*, *13*(2), 96–99. <https://doi.org/10.12788/jhm.2854>

Naidoo, K., Plummer, L., McKean, M., Mack, A., GK, B., MA, M., & Gore, S. (2022). Virtual Faculty and Peer Mentoring to Promote Social Belonging among Minoritized Physical Therapist and Nursing Students. *Healthcare (Basel, Switzerland)*, *10*(3).

<https://doi.org/10.3390/healthcare10030416>

Ockene, J. K., Milner, R. J., Thorndyke, L. E., Congdon, J., & Cain, J. M. (2017). Peers for Promotion: Achieving Academic Advancement through Facilitated Peer Mentoring. *Journal of Faculty Development*, *31*(3), 5–13.

Ogunyemi, D., MJ, S., Alexander, C., Fong, A., & Azziz, R. (2010). Promoting residents' professional development and academic productivity using a structured faculty mentoring program. *Teaching and Learning in Medicine*, *22*(2), 93–96.

<https://doi.org/10.1080/10401331003656413>

Padek, M., Mir, N., Jacob, R. R., Chambers, D. A., Dobbins, M., Emmons, K. M., Kerner, J., Kumanyika, S., Pfund, C., Proctor, E. K., Stange, K. C., & Brownson, R. C. (2018). Training scholars in dissemination and implementation research for cancer prevention and control: A mentored approach. *Implementation Science*, *13*(1), 1–13.

<https://doi.org/10.1186/s13012-018-0711-3>

Petersen, S., Pearson, B. Z., & Moriarty, M. A. (2020). Amplifying Voices: Investigating a Cross-Institutional, Mutual Mentoring Program for URM Women in STEM. *Innovative Higher Education*, *45*(4), 317–332. <https://doi.org/10.1007/s10755-020-09506-w>



Phitayakorn, R., Petrusa, E., & RA, H. (2016). Development and initial results of a mandatory department of surgery faculty mentoring pilot program. *The Journal of Surgical Research*, 205(1), 234–237. <https://doi.org/10.1016/j.jss.2016.06.048>

Pololi, L. H., & Evans, A. T. (2015). Group Peer Mentoring: An Answer to the Faculty Mentoring Problem? A Successful Program at a Large Academic Department of Medicine. *Journal of Continuing Education in the Health Professions*, 35(3), 192–200. <https://doi.org/10.1002/chp.21296>

Pololi, L. H., Knight, S. M., Dennis, K., & Frankel, R. M. (2002). Helping Medical School Faculty Realize Their Dreams: An Innovative, Collaborative Mentoring Program. *Academic Medicine*, 77(5). <https://doi.org/10.1097/00001888-200205000-00005>

Porat-Dahlerbruch, J., Arnold, O., Lamoureux, J., Flores, D., & Hodgson, N. (2021). Implementation and preliminary evaluation of a nursing PhD constellation mentorship model. *Nursing Outlook*, 69(6), 1090–1100. <https://doi.org/10.1016/j.outlook.2021.05.013>

Prendergast, H., Heinert, S., Erickson, T., Thompson, T., & vanden Hoek, T. (2019). Evaluation of an Enhanced Peer Mentoring Program on Scholarly Productivity and Promotion in Academic Emergency Medicine: A Five-Year Review. *Journal of the National Medical Association*, 111(6), 600–605. <https://doi.org/10.1016/j.jnma.2019.07.001>

Prionas, N., Kung, T., Dohn, A., Piro, N., Eyben, R., Katznelson, L., & Caruso, T. (2021). A pilot, randomized controlled trial of telementorship: A useful tool during social distancing. *Journal of Clinical and Translational Research*, 7(1), 66–71.  
<https://pubmed.ncbi.nlm.nih.gov/34104809/>

Quaas, A. M., Berkowitz, L. R., & Tracy, E. E. (2009). Evaluation of a Formal Mentoring Program in an Obstetrics and Gynecology Residency Training Program: Resident Feedback and Suggestions. *Journal of Graduate Medical Education*, 1(1), 132–138.  
<https://doi.org/10.4300/01.01.0022>

Rajendran, L., Jones, D., & Brar, S. (2022). Junior Mentorship Program (JuMP) Start in Surgery- Implications on Trainee Success. *Journal of Surgical Education*, 79(5), 1221–1227.  
<https://doi.org/10.1016/j.jsurg.2022.04.008>

Raub, J. N., Thurston, T. M., Fiorvento, A. D., Mynatt, R. P., & Wilson, S. S. (2015). Implementation and outcomes of a pharmacy residency mentorship program. *American Journal of Health-System Pharmacy*, 72(11\_Supplement\_1), S1–S5.  
<https://doi.org/10.2146/ajhp140884>

Reid Ponte, P., Hayman, L. L., Berry, D. L., & Cooley, M. E. (2015). A new model for postdoctoral training: The nursing postdoctoral program in cancer and health disparities. *Nursing Outlook*, 63(2), 189–203. <https://doi.org/10.1016/j.outlook.2014.11.014>

- Richter, S. K., Crannage, A. J., Pitlick, M. K., Simonyan, A. R., Stacy, Z. A., Stauffer, R. L., van Tuyl, J. S., & Burke, J. M. (2019). An individualized approach to residency preparation for fourth professional year pharmacy students. *Currents in Pharmacy Teaching and Learning*, 11(11), 1159–1166. <https://doi.org/10.1016/j.cptl.2019.07.006>
- Rodríguez-Carrio, J., Putrik, P., Gwinnutt, J., Sepriano, A., Alunno, A., Ramiro, S., Leipe, J., & Nikiphorou, E. (2020). Mentoring for postdoctoral researchers in rheumatology: the Emerging EULAR Network (EMEUNET) post-doc mentoring programme. In *RMD open* (Vol. 6, Issue 1). <https://doi.org/10.1136/rmdopen-2019-001139>
- Santos, J., Goulart, L., Giansante, L., Lin, Y., Sirico, A., Ng, A., Tsapaki, V., Bezak, E., & Ng, K. (2020). Leadership and mentoring in medical physics: The experience of a medical physics international mentoring program. *Physica Medica : PM : An International Journal Devoted to the Applications of Physics to Medicine and Biology : Official Journal of the Italian Association of Biomedical Physics (AIFB)*, 76, 337–344. <https://doi.org/10.1016/j.ejmp.2020.07.023>
- Schroyer, C., Zellers, R., & Abraham, S. (2020). Increasing Registered Nurse Retention Using Mentors in Critical Care Services. *The Health Care Manager*, 39(2), 85–99. <https://doi.org/10.1097/hcm.0000000000000293>
- Scott, E., & Smith, S. (2008). Group mentoring: a transition-to-work strategy. In *Journal for nurses in staff development : JNSD : official journal of the National Nursing Staff*

*Development Organization* (Vol. 24, Issue 5, pp. 232–238).

<https://doi.org/10.1097/01.nnd.0000320691.24135.72>

Singh, S., Singh, N., & Dhaliwal, U. (2014). Near-peer mentoring to complement faculty mentoring of first-year medical students in India. *Journal of Educational Evaluation for Health Professions*, *11*, 12. <https://doi.org/10.3352/jeehp.2014.11.12>

Spence, J., Buddenbaum, J., Bice, P., Welch, J., & Carroll, A. (2018). Independent investigator incubator (I(3)): a comprehensive mentorship program to jumpstart productive research careers for junior faculty. *BMC Medical Education*, *18*(1), 186.

<https://doi.org/10.1186/s12909-018-1290-3>

Tagge, R., DT, L., PB, G., Litvan, I., Cruz-Flores, S., JG, M., & Ovbiagele, B. (2021). TRANSCENDS: A Career Development Program for Underrepresented in Medicine Scholars in Academic Neurology. *Neurology*, *97*(3), 125–133.

<https://doi.org/10.1212/wnl.0000000000012058>

Thorpe, R. J., Vishwanatha, J. K., Harwood, E. M., Krug, E. L., Unold, T., Boman, K. E., & Jones, H. P. (2020). The impact of grantsmanship self-efficacy on early stage investigators of the national research mentoring network steps toward academic research (NRMN STAR). *Ethnicity and Disease*, *30*(1), 75–82.

<https://doi.org/10.18865/ed.30.1.75>

- Tracy, E., Jagsi, R., Starr, R., & Tarbell, N. (2004). Outcomes of a pilot faculty mentoring program. In *American journal of obstetrics and gynecology* (Vol. 191, Issue 6, pp. 1846–1850). <https://doi.org/10.1016/j.ajog.2004.08.002>
- Varkey, P., Jatoi, A., Williams, A., Mayer, A., Ko, M., Files, J., Blair, J., & Hayes, S. (2012). The positive impact of a facilitated peer mentoring program on academic skills of women faculty. *BMC Medical Education*, *12*, 14. <https://doi.org/10.1186/1472-6920-12-14>
- Vasylyeva, T., Díaz-González de Ferris, M., Hains, D., Ho, J., Harshman, L., Reidy, K., Brady, T., Okamura, D., Samsonov, D., Wenderfer, S., & EA, H. (2019). Developing a Research Mentorship Program: The American Society of Pediatric Nephrology's Experience. *Frontiers in Pediatrics*, *7*, 155. <https://doi.org/10.3389/fped.2019.00155>
- Vermund, S., Hamilton, E., Griffith, S., Jennings, L., Dyer, T., Mayer, K., & Wheeler, D. (2018). Recruitment of Underrepresented Minority Researchers into HIV Prevention Research: The HIV Prevention Trials Network Scholars Program. *AIDS Research and Human Retroviruses*, *34*(2), 171–177. <https://doi.org/10.1089/aid.2017.0093>
- Voytko, M. lou, Barrett, N., Courtney-Smith, Di., Golden, S. L., Hsu, F. C., Knovich, M. A., & Crandall, S. (2018). Positive Value of a Women's Junior Faculty Mentoring Program: A Mentor-Mentee Analysis. *Journal of Women's Health*, *27*(8), 1045–1053. <https://doi.org/10.1089/jwh.2017.6661>

Waghel, R. C., Wilson, J. A., Battise, D. M., & Frye, J. (2017). Reflections on a year-long student and pharmacist paired mentorship program. *Currents in Pharmacy Teaching and Learning*, 9(4), 713–718. <https://doi.org/10.1016/j.cptl.2017.03.026>

Welch, J., Jimenez, H., Walthall, J., & Allen, S. (2012). The women in emergency medicine mentoring program: an innovative approach to mentoring. *Journal of Graduate Medical Education*, 4(3), 362–366. <https://doi.org/10.4300/jgme-d-11-00267.1>

Williams, S. N., Thakore, B. K., & McGee, R. (2016a). Career Coaches as a Source of Vicarious Learning for Racial and Ethnic Minority PhD Students in the Biomedical Sciences: A Qualitative Study. *PLOS ONE*, 11(7), e0160038. <https://doi.org/10.1371/JOURNAL.PONE.0160038>

Williams, S. N., Thakore, B. K., & McGee, R. (2016b). Coaching to augment mentoring to achieve faculty diversity: A randomized controlled trial. *Academic Medicine*, 91(8), 1128–1135. <https://doi.org/10.1097/ACM.0000000000001026>

Williams, S. N., Thakore, B. K., & McGee, R. (2017). Providing social support for underrepresented racial and ethnic minority phd students in the biomedical sciences: A career coaching model. *CBE Life Sciences Education*, 16(4). <https://doi.org/10.1187/cbe.17-01-0021>

- Womack, V., Thakore, B., Wood, C., Jewett, D., Jones, R., Ingram, S., Clark, J., Fry, C., Wecker, L., & McGee, R. (2020). The ASPET Mentoring Network: Enhancing Diversity and Inclusion through Career Coaching Groups within a Scientific Society. *CBE Life Sciences Education*, *19*(3), ar29. <https://doi.org/10.1187/cbe.19-10-0195>
- Wright, D., Fry, M., Adams, J., & Bowen, C. (2020). Building research capacity in musculoskeletal health: Qualitative evaluation of a graduate nurse and allied health professional internship programme. *BMC Health Services Research*, *20*(1), 1–10. <https://doi.org/10.1186/s12913-020-05628-1>
- Yamada, K., Slanetz, P. J., & Boiselle, P. M. (2014). Perceived benefits of a radiology resident mentoring program: Comparison of residents with self-selected Vs assigned mentors. *Canadian Association of Radiologists Journal*, *65*(2), 186–191. <https://doi.org/10.1016/j.carj.2013.04.001>
- Zeind, C. S., Zdanowicz, M., MacDonald, K., Parkhurst, C., King, C., & Wizwer, P. (2005). Developing a Sustainable Faculty Mentoring Program. *American Journal of Pharmaceutical Education*, *69*(5), 1–13. <https://doi.org/10.5688/AJ6905100>
- Zhang, H., Isaac, A., Wright, E. D., Alrajhi, Y., & Seikaly, H. (2017). Formal mentorship in a surgical residency training program: a prospective interventional study. *Journal of Otolaryngology - Head and Neck Surgery*, *46*(1), 1–6. <https://doi.org/10.1186/S40463-017-0186-2/TABLES/6>

Zhang, Y., Huang, X., Xu, S., Xu, C., Feng, X., & Jin, J. (2019). Can a one-on-one mentorship program reduce the turnover rate of new graduate nurses in China? A longitudinal study. In *Nurse education in practice* (Vol. 40, p. 102616).  
<https://doi.org/10.1016/j.nepr.2019.08.010>

Zheng, M., Overland, M., Escobar, D., Fakunle, M., Li, Y., Chu, C., Balakrishnan, A., Shee, K., Washington, S., & Hampson, L. (2022). Formal Mentorship as an Opportunity to Expand the Urology Pipeline: Under Represented Trainees Entering Residency (UReTER) Program Evaluation 2020-2021. *Urology*, *162*, 108–113.  
<https://doi.org/10.1016/j.urology.2021.06.052>
